# Supplementary material
Source: Springer Nature journal article supplement (https://www.springermedizin.de/resource/supplementary/12919_2011_40_MOESM4_ESM.pdf/9654334)
Supplement: MOESM4 [file 9654334]

**Additional file 4 — Accuracy of PCA-SVM using different schemes for handling missing data**

| Ethnicity      | # Samples | Missing Data Handling |             |               |
|----------------|-----------|-----------------------|-------------|---------------|
|                |           | rCRS                  | Probability | Common Region |
| Caucasian      | 2807      | 96.94                 | 96.15       | 93.94         |
| Asian          | 915       | 30.60                 | 50.93       | 68.85         |
| African        | 254       | 59.06                 | 57.48       | 76.38         |
| Micro-Accuracy | 3976      | 79.25                 | 83.27       | 87.05         |
| Macro-Accuracy | 3976      | 62.20                 | 68.19       | 79.72         |
